# Supplementary material for: Streptococcus mitis Strains Causing Severe Clinical Disease in Cancer Patients
Source: PubMed Central journal article supplement (PMC4012796; doi:10.3201/eid2005.130953), 2014-05
Supplement: 13-0953-Techapp-s1.pdf [file 13-0953-Techapp-s1.pdf]

# *Streptococcus mitis* Strains Causing Severe Clinical Disease in Cancer Patients

## Technical Appendix 2

Technical Appendix 2 Table 1. Summary of alignment of 76-bp, paired-end reads for viridans group streptococci strains with *Streptococcus mitis* and *S. pneumoniae* reference genomes\*

| Strain  | <i>S. mitis</i> cluster by MLSA | % Coverage of <i>S. mitis</i> B6 genome | % Coverage of <i>S. pneumoniae</i> TIGR4 genome |
|---------|---------------------------------|-----------------------------------------|-------------------------------------------------|
| SVGS001 | 2                               | 66.20                                   | 59.00                                           |
| SVGS002 | 3                               | 69.90                                   | 64.10                                           |
| SVGS003 | 2                               | 67.60                                   | 59.60                                           |
| SVGS004 | 3                               | 68.60                                   | 62.50                                           |
| SVGS005 | 2                               | 67.00                                   | 59.10                                           |
| SVGS011 | 3                               | 70.20                                   | 62.20                                           |
| SVGS016 | 2                               | 68.30                                   | 60.30                                           |
| SVGS019 | 1                               | 70.10                                   | 62.50                                           |
| SVGS021 | NA                              | 65.80                                   | 57.70                                           |
| SVGS022 | 2                               | 68.30                                   | 59.90                                           |

\*SVGS, Shelburne viridans group streptococcus; NA, not applicable because SVGS021 is an *S. oralis* strain.

Technical Appendix 2 Table 2. Presence of genes encoding selected choline-binding proteins among sequenced viridans group streptococci strains and the *Streptococcus pneumoniae* strain TIGR4\*

| Strain† | Gene        |             |             |             |             |             |             |             |             |              |             |
|---------|-------------|-------------|-------------|-------------|-------------|-------------|-------------|-------------|-------------|--------------|-------------|
|         | <i>cbpI</i> | <i>cbpC</i> | <i>cbpJ</i> | <i>cbpF</i> | <i>cbpL</i> | <i>cbpE</i> | <i>lytB</i> | <i>lytC</i> | <i>lytA</i> | <i>lytB2</i> | <i>cbpD</i> |
| TIGR4   | SP_0069     | SP_0377     | SP_0378     | SP_0391     | SP_0667     | SP_0930     | SP_0965     | SP_1573     | SP_1937     | NP           | SP_2201     |
| SVGS001 | No          | Yes         | Yes         | Yes         | Yes         | No          | Yes         | No          | No          | Yes          | Yes         |
| SVGS002 | Yes         | No          | Yes         | Yes         | Yes         | Yes         | Yes         | Yes         | Yes         | No           | Yes         |
| SVGS003 | No          | No          | No          | Yes         | Yes         | No          | Yes         | No          | No          | Yes          | Yes         |
| SVGS004 | Yes         | No          | No          | Yes         | Yes         | Yes         | Yes         | Yes         | No          | No           | Yes         |
| SVGS005 | No          | No          | No          | Yes         | Yes         | No          | Yes         | No          | No          | Yes          | Yes         |
| SVGS011 | Yes         | No          | No          | No          | Yes         | Yes         | Yes         | Yes         | Yes         | Yes          | Yes         |
| SVGS016 | No          | Yes         | Yes         | No          | Yes         | No          | Yes         | No          | No          | Yes          | Yes         |
| SVGS019 | Yes         | Yes         | Yes         | Yes         | Yes         | Yes         | No          | Yes         | No          | Yes          | Yes         |
| SVGS021 | No          | Yes         | Yes         | No          | No          | No          | No          | No          | No          | Yes          | Yes         |
| SVGS022 | No          | Yes         | Yes         | Yes         | Yes         | No          | Yes         | No          | No          | Yes          | Yes         |

\*SVGS, Shelburne viridans group streptococcus; NP, not present in strain TIGR4. *cbpI*, *cbpE*, and *lytC* are shaded to show similar pattern of gene presence/absence among the sequenced strains.

†All SVGS022 strains are *S. mitis* strains, except SVGS021, which is an *S. oralis* strain.

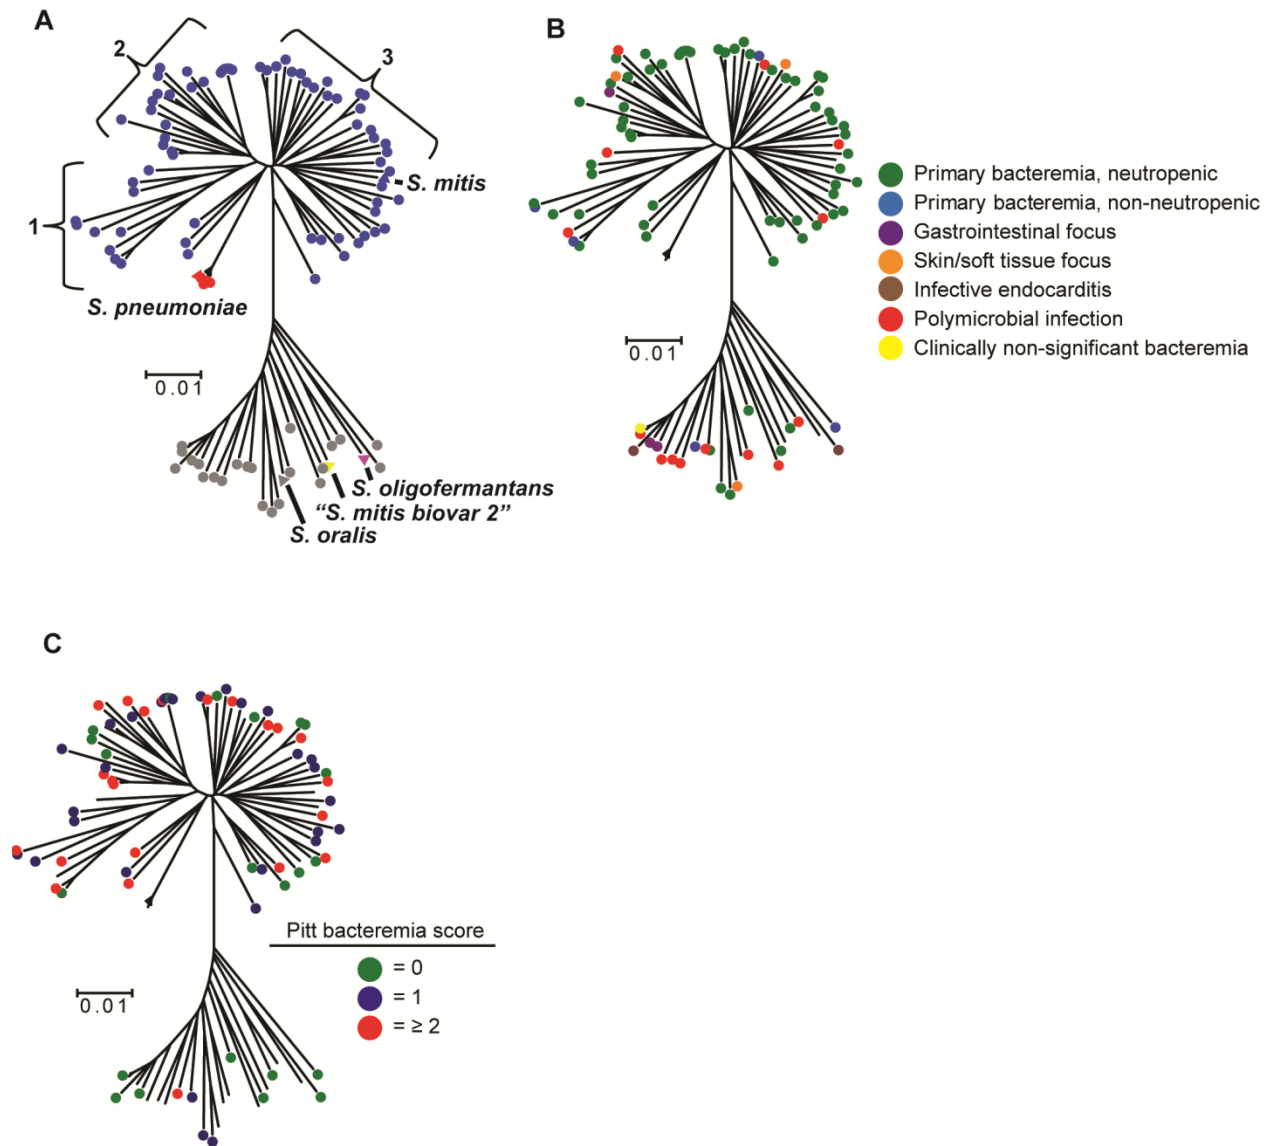

Technical Appendix 2 Figure. Multilocus sequence analysis (MLSA) and clinical correlates of *Streptococcus mitis* and *S. oralis* strains. All panels show neighbor-joining trees of *S. mitis* and *S. oralis* strains derived from MLSA analysis; the scale bar indicates the genetic distance. A) Type viridans group streptococci strains (SK142 for *S. mitis*; SK23 for *S. oralis*; and SK1136 for *S. oligofermantans*), 5 *S. pneumoniae* strains, and strain VS56 (previously characterized as an *S. mitis* biovar 2 strain) are labeled for reference purposes. Numbers 1–3 indicate *S. mitis* clusters. B) Clinical presentation for strains in the study cohort as described in the figure legend. C) Pitt bacteremia scores for strains in the study cohort as described in the figure legend. Scores could not be assigned for patients with polymicrobial infection, and thus no circle is present for strains from these patients.
